# Supplementary material for: A Framework Using Open-Source Software for Land Use Prediction and Climate Data Time Series Analysis in a Protected Area of Portugal: Alvão Natural Park
Source: MDPI journal article supplement (doi:10.3390/land12071302), 2023-06-28
Supplement: s1 [file s1]

## 1. Climate historical and future data in PNA

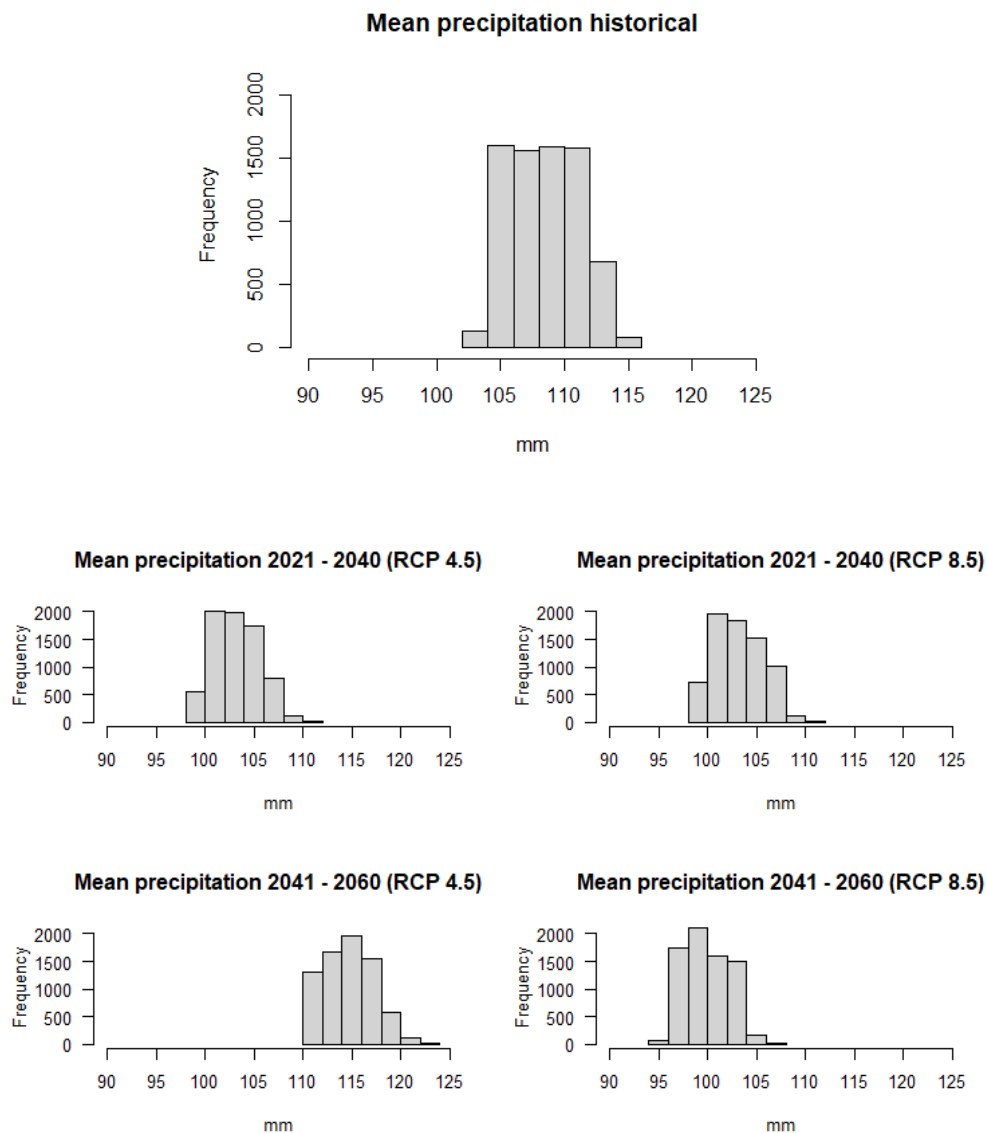

**Figure S1.** Histogram precipitation data.

**Table S1.** Precipitation data statistic.

|                    | RCP 4.5   |           | RCP 8.5   |           |
|--------------------|-----------|-----------|-----------|-----------|
|                    | 2021-2040 | 2041-2060 | 2021-2040 | 2041-2060 |
| Minimum            | 98.67     | 110.1     | 98.5      | 95.5      |
| Mean               | 103.2     | 114.6     | 103.2     | 100.1     |
| Maximum            | 110.17    | 122.2     | 110.3     | 106.92    |
| Variance           | 5.49      | 6.27      | 6.03      | 5.37      |
| Standard deviation | 2.34      | 2.5       | 2.45      | 2.31      |

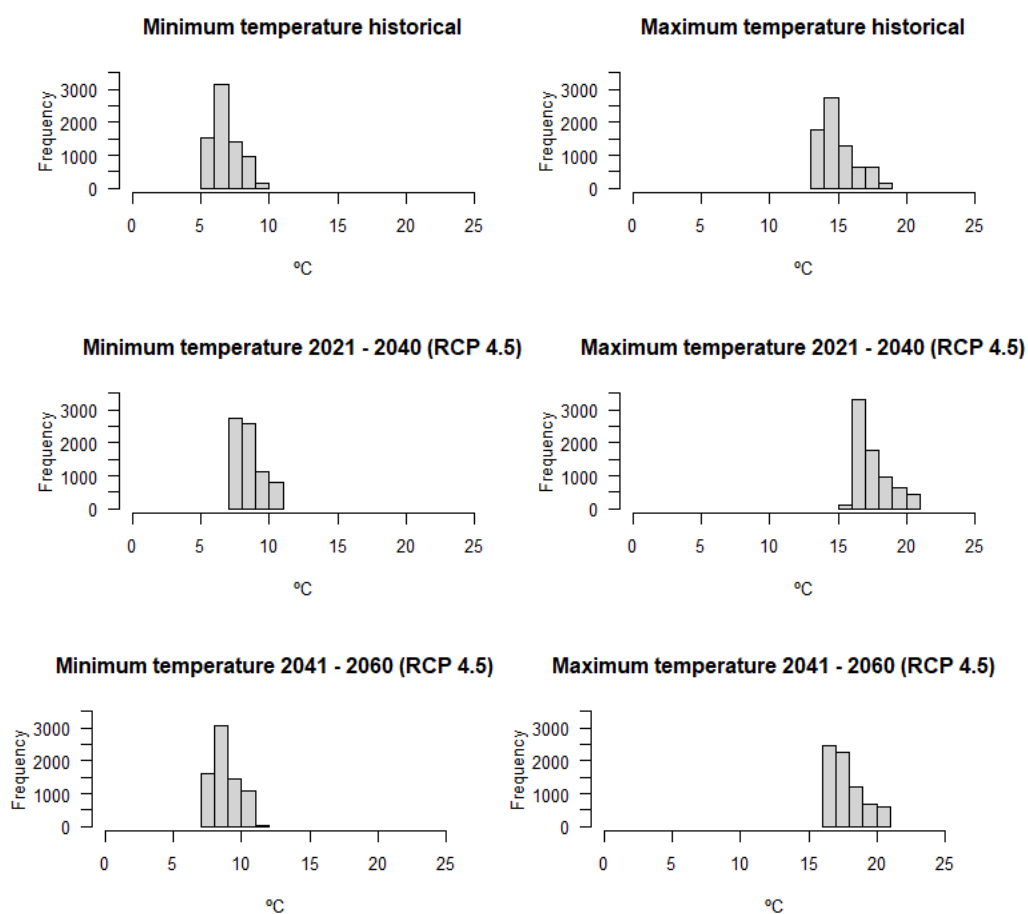

**Figure S2.** Histogram temperature data (RCP 4.5).

**Table S2.** Temperature data statistic (RCP 4.5).

| Minimum temperature |            |           |           |
|---------------------|------------|-----------|-----------|
|                     | Historical | 2021-2040 | 2041-2060 |
| Minimum             | 5.58       | 7.29      | 7.56      |
| Mean                | 6.81       | 8.51      | 8.78      |
| Maximum             | 9.2        | 10.89     | 11.15     |
| Variance            | 0.9        | 0.89      | 0.89      |
| Standard deviation  | 0.94       | 0.94      | 0.94      |
| Maximum temperature |            |           |           |
|                     | Historical | 2021-2040 | 2041-2060 |
| Minimum             | 13.31      | 15.82     | 16.07     |
| Mean                | 14.96      | 17.48     | 17.75     |
| Maximum             | 18.24      | 20.74     | 20.99     |
| Variance            | 1.58       | 1.56      | 1.54      |
| Standard deviation  | 1.25       | 1.25      | 1.24      |

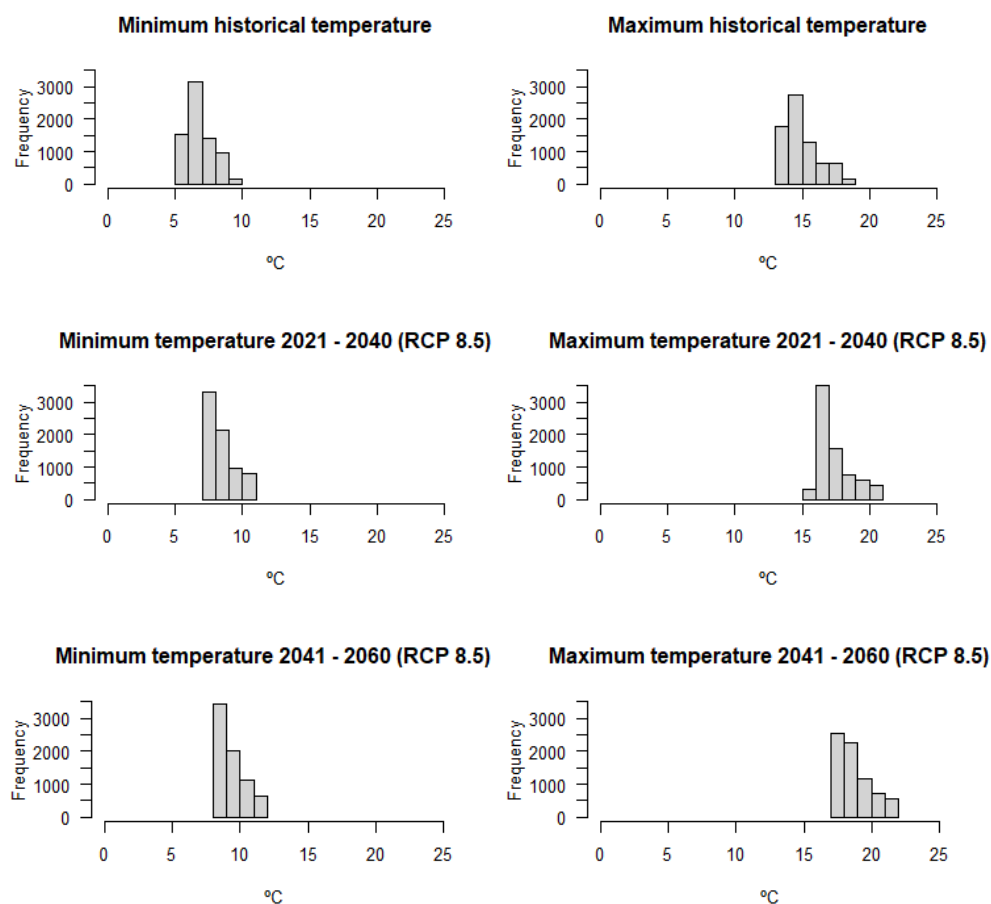

**Figure S3.** Histogram temperature data (RCP 8.5).

**Table S3.** Temperature data statistic (RCP 8.5).

|                    | Minimum temperature |           | Maximum temperature |           |
|--------------------|---------------------|-----------|---------------------|-----------|
|                    | 2021-2040           | 2041-2060 | 2021-2040           | 2041-2060 |
| Minimum            | 15.82               | 16.07     | 15.72               | 17.06     |
| Mean               | 17.48               | 17.75     | 17.38               | 18.73     |
| Maximum            | 20.74               | 20.99     | 20.62               | 21.96     |
| Variance           | 1.56                | 1.54      | 1.56                | 1.53      |
| Standard deviation | 1.25                | 1.24      | 1.24                | 1.23      |

**Table S4.** Mean month precipitation in PNA (HadGEM3-GC31-LL, RCP 4.5)

|            | jan   | feb   | mar   | apr    | may    | jun   | jul   | aug   | sep   | ouc    | nov   | dez   |
|------------|-------|-------|-------|--------|--------|-------|-------|-------|-------|--------|-------|-------|
| Historical | 178.8 | 167.6 | 120   | 120.13 | 95.982 | 61.03 | 19.25 | 20.12 | 61.71 | 128.04 | 159.4 | 170.1 |
| 2021-2040  | 219.3 | 175.3 | 95.82 | 93.97  | 80.29  | 62.9  | 18.19 | 20.13 | 47.71 | 92.1   | 186.6 | 145.7 |
| 2041-2060  | 258.8 | 263.5 | 136.5 | 87.15  | 87.68  | 57.18 | 18.52 | 17.72 | 42.74 | 106.6  | 162.4 | 136.3 |
| 2061-2080  | 226.9 | 216.4 | 100.5 | 90.9   | 83.61  | 56.83 | 15.63 | 17.82 | 41.46 | 83.15  | 201.8 | 204.4 |

**Table S5.** Mean month precipitation in PNA (HadGEM3-GC31-LL, RCP 8.5)

|            | jan   | feb   | mar   | apr    | may    | jun   | jul   | aug   | sep   | ouc    | nov   | dez   |
|------------|-------|-------|-------|--------|--------|-------|-------|-------|-------|--------|-------|-------|
| Historical | 178.8 | 167.6 | 120   | 120.13 | 95.982 | 61.03 | 19.25 | 20.12 | 61.71 | 128.04 | 159.4 | 170.1 |
| 2021-2040  | 192.1 | 173.1 | 119.2 | 96.35  | 86.2   | 56.31 | 16.9  | 18.17 | 49.04 | 110.6  | 163.7 | 156.3 |
| 2041-2060  | 186.3 | 182.8 | 114.9 | 94.5   | 75.55  | 53.53 | 16.51 | 17.35 | 47.04 | 107.3  | 143.3 | 160.5 |
| 2061-2080  | 208.1 | 192.7 | 124.8 | 80.21  | 69.04  | 47.31 | 16.08 | 16.72 | 39.52 | 97.38  | 132.3 | 176.2 |

**Table S6.** Mean month minimum temperature in PNA (HadGEM3-GC31-LL, RCP 4.5)

|            | jan  | feb  | mar  | apr  | may  | jun   | jul   | aug   | sep   | ouc   | nov  | dez  |
|------------|------|------|------|------|------|-------|-------|-------|-------|-------|------|------|
| Historical | 1.65 | 2.00 | 3.59 | 4.69 | 7.23 | 10.81 | 12.80 | 13.13 | 11.35 | 8.07  | 4.39 | 2.48 |
| 2021-2040  | 3.81 | 3.67 | 4.64 | 6.24 | 8.88 | 12.31 | 14.64 | 15.18 | 13.79 | 9.61  | 6.24 | 4.13 |
| 2041-2060  | 4.11 | 4.26 | 4.74 | 5.84 | 8.98 | 12.96 | 14.84 | 15.66 | 13.61 | 10.71 | 6.64 | 4.03 |
| 2061-2080  | 4.71 | 4.57 | 5.24 | 6.24 | 9.44 | 13.92 | 15.82 | 17.24 | 15.08 | 11.39 | 7.64 | 5.23 |

**Table S7.** Mean month minimum temperature in PNA (HadGEM3-GC31-LL, RCP 8.5)

|            | jan  | feb  | mar  | apr  | may   | jun   | jul   | aug   | sep   | ouc   | nov  | dez  |
|------------|------|------|------|------|-------|-------|-------|-------|-------|-------|------|------|
| Historical | 1.65 | 2.00 | 3.59 | 4.69 | 7.23  | 10.81 | 12.80 | 13.13 | 11.35 | 8.07  | 4.39 | 2.48 |
| 2021-2040  | 3.21 | 3.37 | 4.64 | 5.84 | 8.78  | 12.49 | 14.32 | 15.24 | 13.58 | 10.41 | 6.44 | 4.03 |
| 2041-2060  | 4.41 | 4.27 | 5.62 | 6.44 | 9.28  | 13.25 | 15.29 | 16.32 | 14.54 | 11.55 | 7.34 | 5.23 |
| 2061-2080  | 5.31 | 5.37 | 6.64 | 7.64 | 10.68 | 14.09 | 16.72 | 18.13 | 16.10 | 12.82 | 8.84 | 6.23 |

**Table S8.** Mean month maximum temperature in PNA (HadGEM3-GC31-LL, RCP 4.5)

|            | jan   | feb   | mar   | apr   | may   | jun   | jul   | aug   | sep   | ouc   | nov   | Dez   |
|------------|-------|-------|-------|-------|-------|-------|-------|-------|-------|-------|-------|-------|
| Historical | 7.85  | 8.97  | 11.09 | 12.78 | 15.75 | 20.81 | 23.59 | 23.87 | 20.69 | 15.55 | 10.79 | 8.36  |
| 2021-2040  | 10.02 | 10.75 | 12.88 | 15.44 | 18.54 | 23.46 | 26.44 | 26.51 | 24.45 | 19.02 | 13.27 | 10.39 |
| 2041-2060  | 10.32 | 11.15 | 12.28 | 14.74 | 18.67 | 24.39 | 26.76 | 27.34 | 25.01 | 19.55 | 13.66 | 10.49 |
| 2061-2080  | 10.98 | 11.62 | 13.56 | 16.12 | 19.77 | 25.67 | 29.21 | 29.70 | 26.51 | 21.15 | 14.27 | 11.23 |

**Table S9.** Mean month maximum temperature in PNA (HadGEM3-GC31-LL, RCP 8.5)

|            | jan   | feb   | mar   | apr   | may   | jun   | jul   | aug   | sep   | ouc   | nov   | dez   |
|------------|-------|-------|-------|-------|-------|-------|-------|-------|-------|-------|-------|-------|
| Historical | 7.85  | 8.97  | 11.09 | 12.78 | 15.75 | 20.81 | 23.59 | 23.87 | 20.69 | 15.55 | 10.79 | 8.36  |
| 2021-2040  | 9.62  | 10.65 | 12.66 | 14.74 | 18.32 | 23.55 | 26.44 | 26.91 | 24.41 | 19.08 | 13.26 | 10.32 |
| 2041-2060  | 10.92 | 11.64 | 13.76 | 15.83 | 19.76 | 25.42 | 27.93 | 28.40 | 25.81 | 20.65 | 14.46 | 11.49 |
| 2061-2080  | 11.92 | 12.78 | 14.96 | 17.82 | 22.09 | 26.82 | 30.00 | 30.47 | 27.91 | 22.85 | 16.20 | 12.63 |

## 2. Climate historical and future data by land use classes in 1995, 2018 and 2041

**Table S10.** Precipitation by land use classes (RCP 4.5)

|        | 1995   |         |      |     |      |      |     | 2018   |         |      |     |      |      |     | 2041   |         |      |      |      |       |      |
|--------|--------|---------|------|-----|------|------|-----|--------|---------|------|-----|------|------|-----|--------|---------|------|------|------|-------|------|
|        | Artifi | Agricul | Past | For | Bus  | Op   | Wat | Artifi | Agricul | Past | For | Bus  | Op   | Wat | Artifi | Agricul | Past | Fore | Bus  | e or  | Wat  |
|        | cial   | ture    | ure  | est | hes  | en   | er  | cial   | ture    | ure  | est | hes  | en   | er  | cial   | ture    | ure  | st   | hes  | non-  | er   |
|        | surfa  | ce      |      |     |      | spa  |     | surfa  | ce      |      |     |      | spa  |     | surfa  | ce      |      |      |      | vege  |      |
|        |        |         |      |     |      | ce   |     |        |         |      |     |      | ce   |     |        |         |      |      |      | tatio |      |
|        |        |         |      |     |      | veg  |     |        |         |      |     |      | veg  |     |        |         |      |      |      | n     |      |
|        |        |         |      |     |      | etat |     |        |         |      |     |      | etat |     |        |         |      |      |      |       |      |
|        |        |         |      |     |      | ion  |     |        |         |      |     |      | ion  |     |        |         |      |      |      |       |      |
| Minim  | 104.3  | 103.8   | 105  | 103 | 103. | 104  | 107 | 104.3  | 103.8   | 105. | 103 | 103. | 104  | 107 | 110.6  | 110.4   | 112. | 110. | 110. | 110.  | 114. |
| um     |        |         |      | .2  | 2    | .3   | .8  |        |         | 9    | .2  | 2    | .3   | .8  |        |         | 2    | 1    | 1    | 9     | 1    |
| 1st qu | 105.9  | 106.1   | 108. | 105 | 107. | 108  | 109 | 106    | 105.4   | 107. | 105 | 107. | 107  | 109 | 112.5  | 111.8   | 113. | 111. | 114. | 113.  | 115. |
|        |        |         | 2    |     | 1    | .1   |     |        |         | 1    | .4  | 8    | .2   |     |        |         | 6    | 8    | 2    | 4     | 3    |
| Mean   | 106.9  | 106.8   | 109. | 106 | 109. | 109  | 108 | 106.8  | 106.5   | 107. | 106 | 109. | 108  | 108 | 113.1  | 112.7   | 114  | 113  | 115. | 114.  | 115. |
|        |        |         | 5    | .8  | 2    | .4   | .9  |        |         | 7    | .7  | 4    | .7   | .9  |        |         |      |      | 7    | 6     | 2    |
| 3rd qu | 108    | 107.8   | 111. | 108 | 111. | 111  | 109 | 107.8  | 107.1   | 108. | 107 | 111. | 110  | 109 | 114.1  | 112.8   | 114. | 113. | 117. | 115.  | 115. |
|        |        |         | 2    | .2  | 4    | .1   |     |        |         | 1    | .8  | 8    | .7   |     |        |         | 3    | 5    | 7    | 9     | 3    |
| Maxim  | 109.2  | 110.1   | 112. | 114 | 115. | 113  | 109 | 109.2  | 110.1   | 110. | 114 | 115. | 113  | 109 | 115.2  | 115.9   | 115. | 120. | 122. | 118.  | 115. |
| um     |        |         | 5    | .6  | 9    | .2   |     |        |         | 5    | .6  | 9    | .2   |     |        |         | 6    | 7    | 2    | 4     | 3    |

**Table S11.** Precipitation by land use classes (RCP 8.5)

|        | 1995   |         |      |     |      |      |     | 2018   |         |      |     |      |      |     | 2041   |         |      |      |      |       |      |
|--------|--------|---------|------|-----|------|------|-----|--------|---------|------|-----|------|------|-----|--------|---------|------|------|------|-------|------|
|        | Artifi | Agricul | Past | For | Bus  | Op   | Wat | Artifi | Agricul | Past | For | Bus  | Op   | Wat | Artifi | Agricul | Past | Fore | Bus  | e or  | Wat  |
|        | cial   | ture    | ure  | est | hes  | en   | er  | cial   | ture    | ure  | est | hes  | en   | er  | cial   | ture    | ure  | st   | hes  | non-  | er   |
|        | surfa  | ce      |      |     |      | spa  |     | surfa  | ce      |      |     |      | spa  |     | surfa  | ce      |      |      |      | vege  |      |
|        |        |         |      |     |      | ce   |     |        |         |      |     |      | ce   |     |        |         |      |      |      | tatio |      |
|        |        |         |      |     |      | veg  |     |        |         |      |     |      | veg  |     |        |         |      |      |      | n     |      |
|        |        |         |      |     |      | etat |     |        |         |      |     |      | etat |     |        |         |      |      |      |       |      |
|        |        |         |      |     |      | ion  |     |        |         |      |     |      | ion  |     |        |         |      |      |      |       |      |
| Minim  | 104.3  | 103.8   | 105  | 103 | 103. | 104  | 107 | 104.3  | 103.8   | 105. | 103 | 103. | 104  | 107 | 96.42  | 96.08   | 97.7 | 95.5 | 95.5 | 96.4  | 99.4 |
| um     |        |         |      | .2  | 2    | .3   | .8  |        |         | 9    | .2  | 2    | .3   | .8  |        |         | 5    |      |      | 2     | 2    |
| 1st qu | 105.9  | 106.1   | 108. | 105 | 107. | 108  | 109 | 106    | 105.4   | 107. | 105 | 107. | 107  | 109 | 97.83  | 97.42   | 99   | 97.3 | 99.5 | 98.5  | 100. |
|        |        |         | 2    |     | 1    | .1   |     |        |         | 1    | .4  | 8    | .2   |     |        |         |      | 3    | 8    |       | 5    |
| Mean   | 106.9  | 106.8   | 109. | 106 | 109. | 109  | 108 | 106.8  | 106.5   | 107. | 106 | 109. | 108  | 108 | 98.65  | 98.19   | 99.3 | 98.5 | 101  | 99.8  | 100. |
|        |        |         | 5    | .8  | 2    | .4   | .9  |        |         | 7    | .7  | 4    | .7   | .9  |        |         | 3    | 1    |      | 1     | 41   |

|         |       |       |       |       |       |       |     |       |       |       |       |       |       |     |        |        |        |        |        |        |       |
|---------|-------|-------|-------|-------|-------|-------|-----|-------|-------|-------|-------|-------|-------|-----|--------|--------|--------|--------|--------|--------|-------|
| 3rd qu  | 108   | 107.8 | 111.2 | 108.2 | 111.4 | 111.1 | 109 | 107.8 | 107.1 | 108.1 | 107.8 | 111.8 | 110.7 | 109 | 99.42  | 98.83  | 99.67  | 99     | 102.75 | 101    | 100.5 |
| Maximum | 109.2 | 110.1 | 112.5 | 114.6 | 115.9 | 113.2 | 109 | 109.2 | 110.1 | 110.5 | 114.6 | 115.9 | 113.2 | 109 | 100.58 | 101.33 | 100.92 | 105.67 | 106.92 | 103.58 | 100.5 |

**Table S12.** Minimum temperature by land use classes (RCP 4.5)

|         | 1995               |             |         |        |        |              |       | 2018               |             |         |        |        |              |       | 2041               |             |         |        |        |              |       |
|---------|--------------------|-------------|---------|--------|--------|--------------|-------|--------------------|-------------|---------|--------|--------|--------------|-------|--------------------|-------------|---------|--------|--------|--------------|-------|
|         | Artificial surface | Agriculture | Pasture | Forest | Bushes | Open non-ter | Water | Artificial surface | Agriculture | Pasture | Forest | Bushes | Open non-ter | Water | Artificial surface | Agriculture | Pasture | Forest | Bushes | Open non-ter | Water |
| Minimum | 6.3                | 6.05        | 5.66    | 5.94   | 5.58   | 5.58         | 6.2   | 6.3                | 6.05        | 5.92    | 5.94   | 5.59   | 5.58         | 6.26  | 8.26               | 8.01        | 8.08    | 7.9    | 7.56   | 7.56         | 8.23  |
| 1st qu  | 6.64               | 6.51        | 5.81    | 6.44   | 5.91   | 5.92         | 6.6   | 6.64               | 6.82        | 6.4     | 6.68   | 5.9    | 6.26         | 6.26  | 8.6                | 9.01        | 8.33    | 8.75   | 7.82   | 8.31         | 8.23  |
| Mean    | 7.63               | 7.29        | 6.45    | 7.36   | 6.58   | 6.41         | 6.28  | 7.55               | 7.44        | 6.49    | 7.6    | 6.41   | 6.53         | 6.28  | 9.54               | 9.49        | 8.45    | 9.61   | 8.32   | 8.63         | 8.24  |
| 3rd qu  | 8.79               | 7.78        | 6.67    | 8.07   | 7.05   | 6.71         | 6.2   | 8.79               | 7.78        | 6.61    | 8.52   | 6.66   | 6.79         | 6.26  | 10.75              | 9.75        | 8.58    | 10.49  | 8.56   | 8.79         | 8.23  |
| Maximum | 9.02               | 9.02        | 8.45    | 9.18   | 9.2    | 8.86         | 6.45  | 9.02               | 9.02        | 7.36    | 9.2    | 8.95   | 8.45         | 6.45  | 10.99              | 10.99       | 9.33    | 11.15  | 10.91  | 10.41        | 8.42  |

**Table S13.** Minimum temperature by land use classes (RCP 8.5)

|  | 1995               |             |         |        |        |              |       | 2018               |             |         |        |        |              |       | 2041               |             |         |        |        |              |       |
|--|--------------------|-------------|---------|--------|--------|--------------|-------|--------------------|-------------|---------|--------|--------|--------------|-------|--------------------|-------------|---------|--------|--------|--------------|-------|
|  | Artificial surface | Agriculture | Pasture | Forest | Bushes | Open non-ter | Water | Artificial surface | Agriculture | Pasture | Forest | Bushes | Open non-ter | Water | Artificial surface | Agriculture | Pasture | Forest | Bushes | Open non-ter | Water |

|         |     |     |     |     |      |     |     |      |      |      |      |      |     |   |      |       |       |      |      |      |      |      |
|---------|-----|-----|-----|-----|------|-----|-----|------|------|------|------|------|-----|---|------|-------|-------|------|------|------|------|------|
| Minimum | 6.3 | 6.0 | 5.6 | 5.9 | 5.58 | 5.5 | 6.2 | 6.3  | 6.05 | 5.92 | 5.94 | 5.59 | 5.5 | 8 | 6.26 | 8.85  | 8.63  | 8.69 | 8.49 | 8.16 | 8.16 | 8.84 |
| 1st qu  | 6.6 | 6.5 | 5.8 | 6.4 | 5.91 | 5.9 | 6.6 | 6.64 | 6.82 | 6.4  | 6.68 | 5.9  | 6.2 | 6 | 6.26 | 9.21  | 9.6   | 8.94 | 9.34 | 8.43 | 8.92 | 8.84 |
| Mean    | 7.6 | 7.2 | 6.4 | 7.3 | 6.58 | 6.4 | 6.2 | 7.55 | 7.44 | 6.49 | 7.6  | 6.41 | 6.5 | 3 | 6.28 | 10.13 | 10.07 | 9.05 | 10.2 | 8.92 | 9.23 | 8.85 |
| 3rd qu  | 8.7 | 7.7 | 6.6 | 8.0 | 7.05 | 6.7 | 6.2 | 8.79 | 7.78 | 6.61 | 8.52 | 6.66 | 6.7 | 9 | 6.26 | 11.33 | 10.33 | 9.19 | 11.0 | 9.15 | 9.4  | 8.84 |
| Maximum | 9.0 | 9.0 | 8.4 | 9.1 | 9.2  | 8.8 | 6.4 | 9.02 | 9.02 | 7.36 | 9.2  | 8.95 | 8.4 | 5 | 6.45 | 11.56 | 11.56 | 9.91 | 11.7 | 11.4 | 11   | 9.03 |
|         | 2   | 2   | 5   | 8   |      | 6   | 5   |      |      |      |      |      |     |   |      |       |       |      | 3    | 9    |      |      |

Table S14. Maximum temperature by land use classes (RCP 4.5)

|         | 1995               |             |         |        |        |            |       | 2018               |             |         |        |        |            |       | 2041               |             |         |        |        |            |       |
|---------|--------------------|-------------|---------|--------|--------|------------|-------|--------------------|-------------|---------|--------|--------|------------|-------|--------------------|-------------|---------|--------|--------|------------|-------|
|         | Artificial surface | Agriculture | Pasture | Forest | Bushes | Open space | Water | Artificial surface | Agriculture | Pasture | Forest | Bushes | Open space | Water | Artificial surface | Agriculture | Pasture | Forest | Bushes | Open space | Water |
| Minimum | 14.29              | 14.05       | 13.72   | 13.48  | 13.31  | 13.43      | 14.28 | 14.29              | 14.05       | 14.01   | 13.48  | 13.31  | 13.43      | 14.28 | 17.08              | 16.88       | 16.99   | 16.25  | 16.07  | 16.33      | 17.07 |
| 1st qu  | 16.61              | 14.61       | 13.88   | 14.47  | 13.79  | 13.88      | 14.28 | 14.61              | 15.07       | 15.52   | 14.72  | 13.77  | 14.09      | 14.28 | 17.41              | 17.91       | 17.29   | 17.64  | 16.56  | 17.02      | 17.07 |
| Mean    | 15.65              | 15.61       | 14.66   | 15.66  | 14.66  | 14.45      | 14.33 | 15.96              | 15.77       | 14.61   | 15.98  | 14.45  | 14.55      | 14.33 | 18.76              | 18.65       | 17.39   | 18.82  | 17.17  | 17.49      | 17.09 |
| 3rd qu  | 17.72              | 16.23       | 14.48   | 16.62  | 15.15  | 14.66      | 14.28 | 17.72              | 16.23       | 14.78   | 17.27  | 14.68  | 14.85      | 14.28 | 20.48              | 19          | 17.51   | 20.04  | 17.42  | 17.86      | 17.07 |
| Maximum | 18.04              | 18.04       | 17.21   | 18.22  | 18.24  | 17.77      | 15.57 | 18.04              | 18.04       | 15.58   | 18.24  | 17.89  | 17.21      | 14.57 | 20.81              | 20.81       | 18.35   | 20.99  | 20.66  | 19.98      | 17.36 |

Table S15. Maximum temperature by land use classes (RCP 8.5)

|  | 1995               |             |         |        |        |            |       | 2018               |             |         |        |        |            |       | 2041               |             |         |        |        |            |       |
|--|--------------------|-------------|---------|--------|--------|------------|-------|--------------------|-------------|---------|--------|--------|------------|-------|--------------------|-------------|---------|--------|--------|------------|-------|
|  | Artificial surface | Agriculture | Pasture | Forest | Bushes | Open space | Water | Artificial surface | Agriculture | Pasture | Forest | Bushes | Open space | Water | Artificial surface | Agriculture | Pasture | Forest | Bushes | Open space | Water |

|        | surf<br>ace |     |     |     |      |     |     | or<br>non<br>-<br>veg<br>etati<br>on |       |      |      |      |      |      | or<br>non<br>-<br>veg<br>etati<br>on |       |      |      |      |     |      | or<br>non<br>-<br>veg<br>etati<br>on |  |  |  |  |  |  |
|--------|-------------|-----|-----|-----|------|-----|-----|--------------------------------------|-------|------|------|------|------|------|--------------------------------------|-------|------|------|------|-----|------|--------------------------------------|--|--|--|--|--|--|
| Minim  | 14.         | 14. | 13. | 13. | 13.3 | 13. | 14. | 14.2                                 |       | 14.0 | 13.4 | 13.3 | 13.  | 14.2 | 18.07                                | 17.84 | 17.9 | 17.2 | 17.0 | 17. | 18.0 |                                      |  |  |  |  |  |  |
| um     | 29          | 05  | 72  | 48  | 1    | 43  | 28  | 9                                    | 14.05 | 1    | 8    | 1    | 43   | 8    |                                      |       | 6    | 3    | 6    | 32  | 6    |                                      |  |  |  |  |  |  |
|        | 16.         | 14. | 13. | 14. | 13.7 | 13. | 14. | 14.6                                 |       | 14.7 | 13.7 | 14.  | 14.2 |      |                                      |       | 18.2 | 18.6 | 17.6 | 18. | 18.0 |                                      |  |  |  |  |  |  |
| 1st qu | 61          | 61  | 88  | 47  | 9    | 88  | 28  | 1                                    | 15.07 | 15.5 | 2    | 7    | 09   | 8    | 18.39                                | 18.89 | 7    | 2    | 2    | 02  | 6    |                                      |  |  |  |  |  |  |
|        | 15.         | 15. | 14. | 15. | 14.6 | 14. | 14. | 15.9                                 |       | 14.6 | 15.9 | 14.4 | 14.  | 14.3 |                                      |       | 18.3 | 19.7 | 18.1 | 18. | 18.0 |                                      |  |  |  |  |  |  |
| Mean   | 65          | 61  | 66  | 66  | 6    | 45  | 3   | 6                                    | 15.77 | 1    | 8    | 5    | 55   |      | 19.74                                | 19.63 | 8    | 9    | 5    | 48  | 8    |                                      |  |  |  |  |  |  |
|        | 17.         | 16. | 14. | 16. | 15.1 | 14. | 14. | 17.7                                 |       | 14.7 | 17.2 | 14.6 | 14.  | 14.2 |                                      |       | 18.4 |      | 18.3 | 18. | 18.0 |                                      |  |  |  |  |  |  |
| 3rd qu | 72          | 23  | 48  | 62  | 5    | 66  | 28  | 2                                    | 16.23 | 8    | 7    | 8    | 85   | 8    | 21.44                                | 19.98 | 9    | 21   | 8    | 85  | 6    |                                      |  |  |  |  |  |  |
| Maxim  | 18.         | 18. | 17. | 18. | 18.2 | 17. | 15. | 18.0                                 |       | 15.5 | 18.2 | 17.8 | 17.  | 14.5 |                                      |       | 19.3 | 21.9 | 21.6 | 20. | 18.3 |                                      |  |  |  |  |  |  |
| um     | 04          | 04  | 21  | 2   | 4    | 77  | 57  | 4                                    | 18.04 | 8    | 4    | 9    | 21   | 7    | 21.77                                | 21.77 | 3    | 6    | 2    | 96  | 5    |                                      |  |  |  |  |  |  |
